# Supplementary material for: Ni nanoparticle doped porous VN nanoflakes assembled into hierarchical hollow microspheres with a structural inheritance from the Ni1−xVxO2 cathode material for high performance asymmetric supercapacitors
Source: Royal Society of Chemistry journal article supplement (doi:10.1039/c5ta10406h), 2016-01-01
Supplement: c5ta10406h1.pdf [file c5ta10406h1.pdf]

**Ni Nanoparticle Doped porous VN Nanoflake Assembled into Hierarchical Hollow Microspheres with a Structural Inheritance from the  $\text{Ni}_{1-x}\text{V}_x\text{O}_2$  cathode material for High Performance Asymmetric Supercapacitor**

*Chenchen Ji,<sup>1</sup> Jinglei Bi,<sup>1</sup> Shan Wang,<sup>1</sup> Xiaojing Zhang,<sup>1</sup> and Shengchun Yang<sup>1,2\*</sup>*

<sup>1</sup> MOE Key Laboratory for Non-equilibrium Synthesis and Modulation of Condensed Matter, State Key Laboratory for Mechanical Behavior of Materials, Xi'an Jiaotong University, Xi'an, 710049, People's Republic of China.

<sup>2</sup> Collaborative Innovation Center of Suzhou Nano Science and Technology, Suzhou Academy of Xi'an jiaotong University, 215000, Suzhou, People's Republic of China.

Email: ysch1209@mail.xjtu.edu.cn, +86-29-82663034.

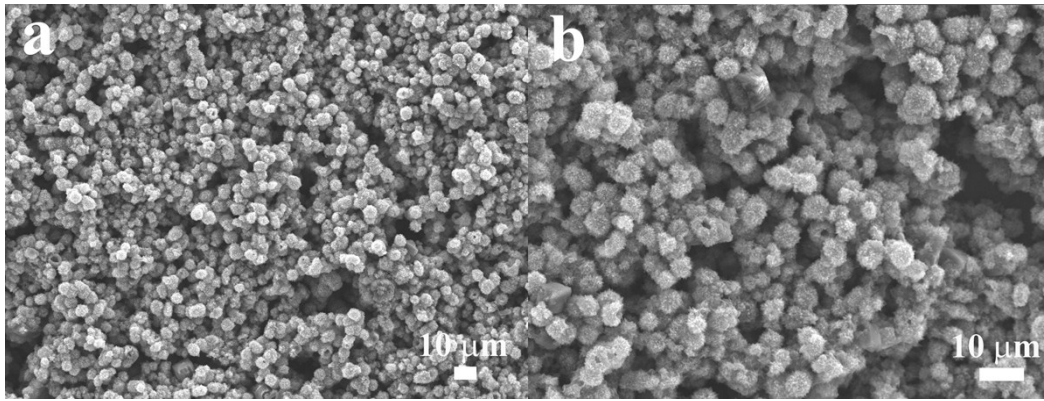

Fig.S1. Panoramic SEM images of the (a)  $\text{Ni}_{1-x}\text{V}_x\text{O}_2$  HHMS and the (b) Ni/VN HHMS samples.

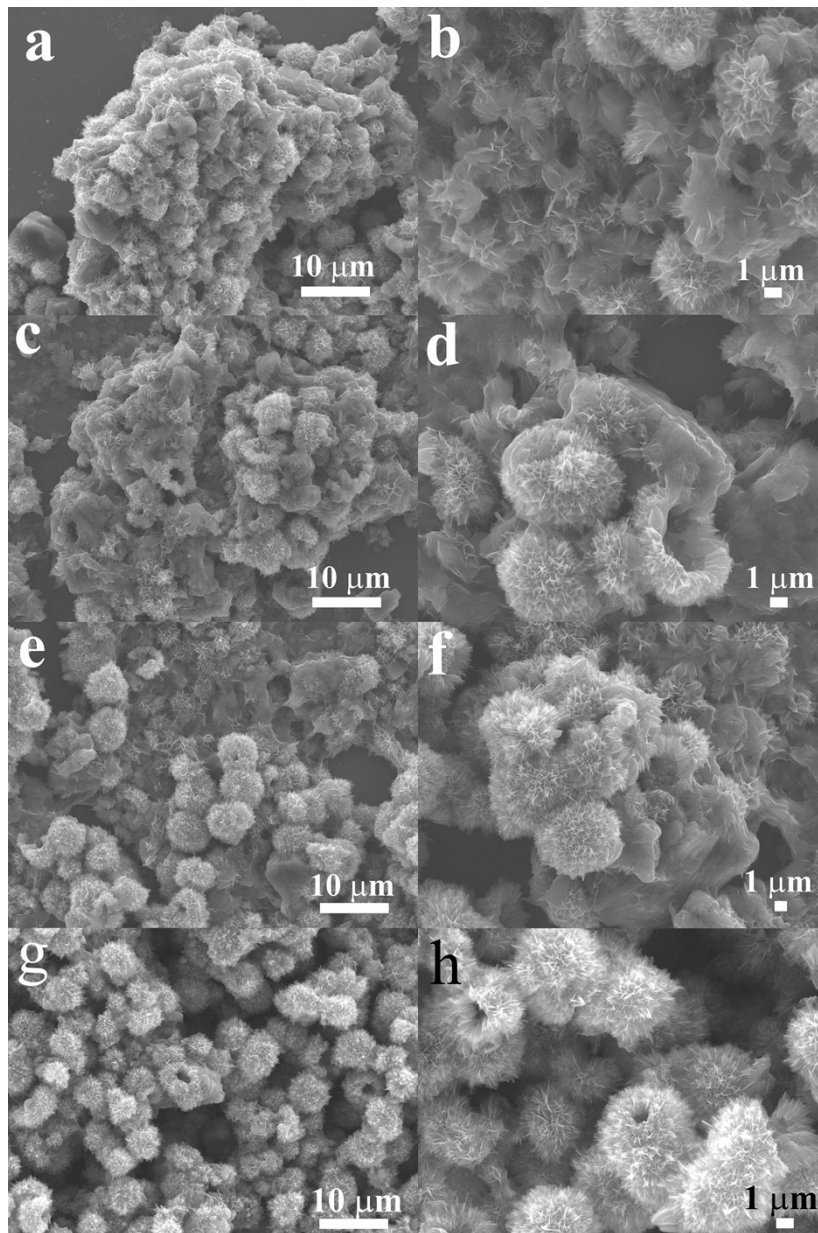

Fig.S2. Time-dependent experiments for the growth of HHMS structure. Growth at (a and b) 6 h, (c and d) 12 h, (e and f) 18 h, and (g and h) 24 h, respectively.

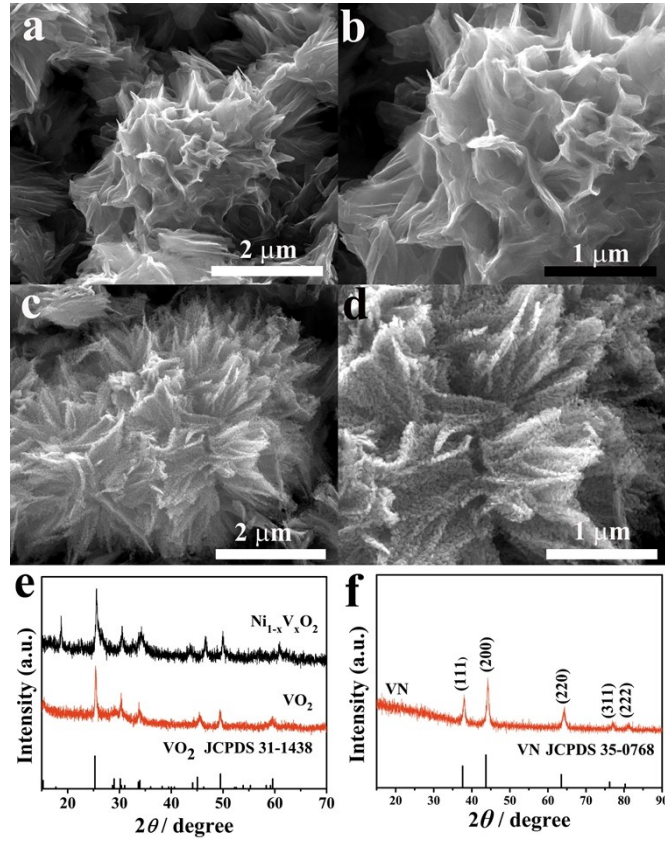

Fig.S3. (a-b) SEM images of the VO<sub>2</sub> sample. (c-d) SEM images of the VN sample. XRD patterns of the (e) the VO<sub>2</sub> and (f) the VN samples.

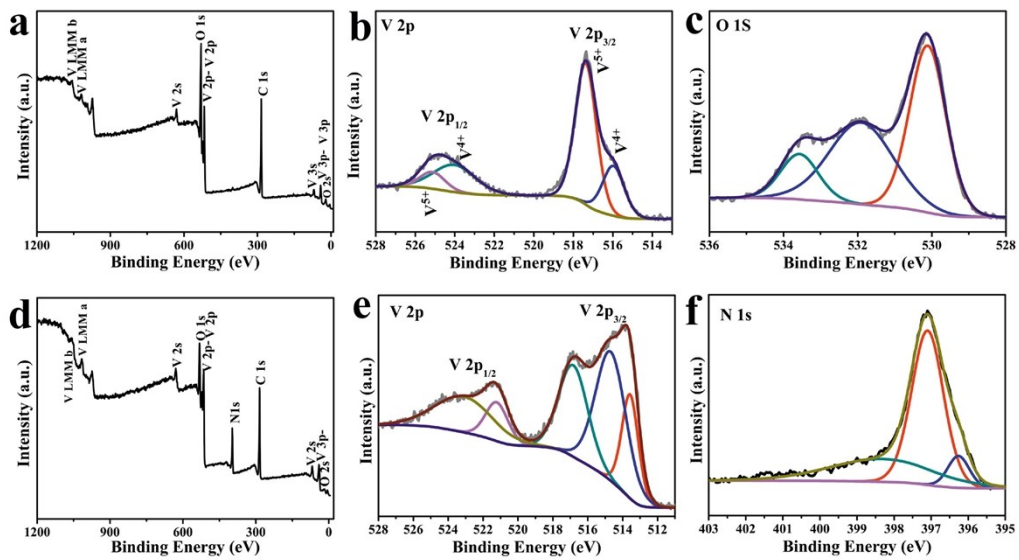

Fig.S4. XPS spectra of (a) survey scan, (b) V 2p region, and (c) O 1s region for the VO<sub>2</sub> sample. XPS spectra of (d) survey scan, (e) V 2p region, and (f) N 1s region for the VN sample.

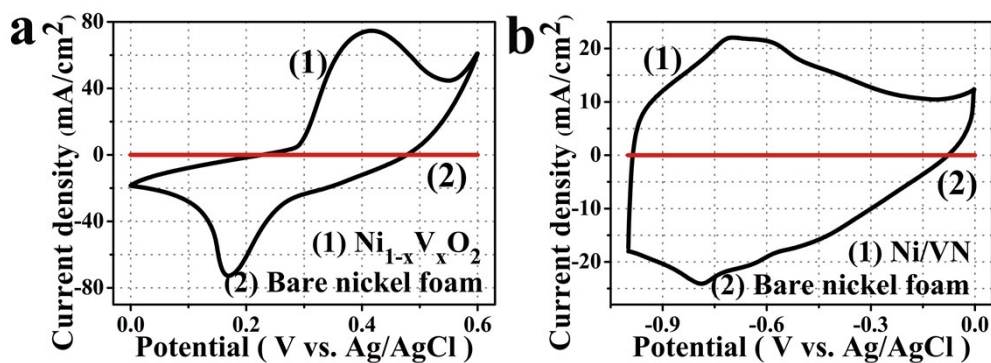

Fig.S5 (a) CV curves of bare nickel foam (the red line) and Ni<sub>1-x</sub>V<sub>x</sub>O<sub>2</sub> composite electrode (the black line) measured at a scan rate of 30 mV s<sup>-1</sup> in 2.0 M KOH aqueous electrolyte. (b) CV curves of bare nickel foam (the red line) and Ni/VN composite electrode (the black line) measured at a scan rate of 30 mV s<sup>-1</sup> in 2.0 M KOH aqueous electrolyte.

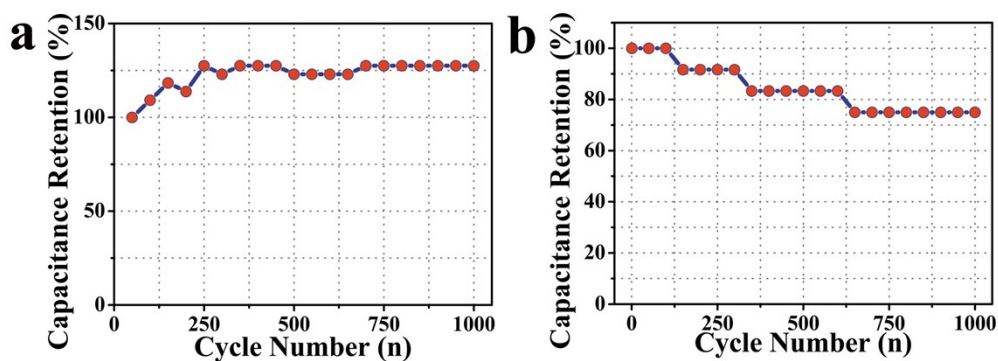

Fig.S6 Long-term cycling stability of the (a) Ni<sub>1-x</sub>V<sub>x</sub>O<sub>2</sub> HHMS and (b) Ni/VN HHMS electrodes at a current density of 10 mA cm<sup>-2</sup> in 2 M KOH electrolyte in a three-electrode system.

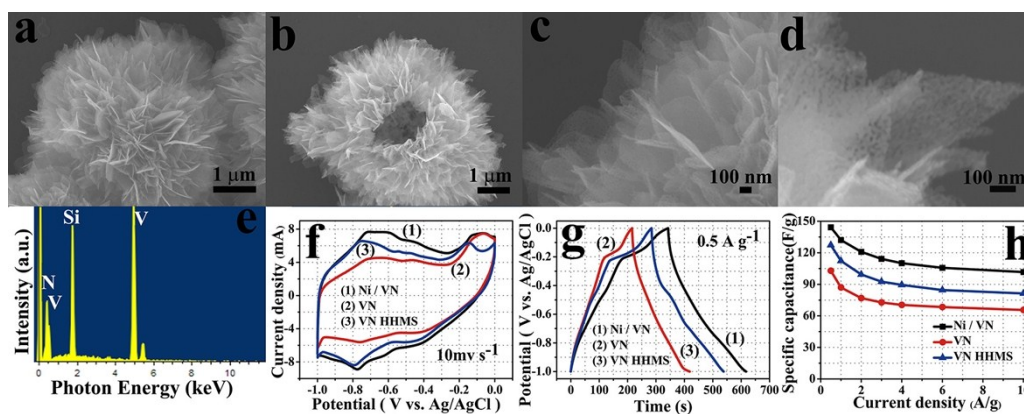

Fig.S7 (a-d) SEM images of the VN HHMS sample. (e) EDS spectrum of the VN HHMS sample. (f) CV curves of the Ni/VN, VN and VN HHMS electrodes at a scan rate of 10 mV s<sup>-1</sup>. (g) GCD curves of the Ni/VN, VN and VN HHMS electrodes at a current density of 0.5 A g<sup>-1</sup>. (h) Variation of specific capacitances against current densities for the Ni/VN, VN and VN HHMS electrodes.

### Table SI. The Specific Capacitance Comparison of Other ASC Full Cells

| Serial no. | ASC                                                      | Electrolyte                           | Specific capacitance   | Ref      |
|------------|----------------------------------------------------------|---------------------------------------|------------------------|----------|
| 1          | rGO//NiO                                                 | 1 M KOH                               | 50 F g <sup>-1</sup>   | 1        |
| 2          | CNFs//Ni <sub>3</sub> S <sub>2</sub> /CNFs               | 2 M KOH                               | 56.6 F g <sup>-1</sup> | 2        |
| 3          | AC//Co <sub>3</sub> O <sub>4</sub> NSs-rGO               | 2 M KOH                               | 46 F g <sup>-1</sup>   | 3        |
| 4          | AC//Ni-Co oxide                                          | 1 M KOH                               | 60 F g <sup>-1</sup>   | 4        |
| 5          | GHCS//GHCS-MnO <sub>2</sub>                              | 1 M Na <sub>2</sub> SO <sub>4</sub>   | 24.5 F g <sup>-1</sup> | 5        |
| 6          | carbon//nickel oxide                                     | 6 M KOH                               | 37 F g <sup>-1</sup>   | 6        |
| 7          | GH//MnO <sub>2</sub> -NF                                 | 0.5 M Na <sub>2</sub> SO <sub>4</sub> | 41.7 F g <sup>-1</sup> | 7        |
| 8          | AC//AC-MnO <sub>2</sub>                                  | 0.5 M Na <sub>2</sub> SO <sub>4</sub> | 23.1 F g <sup>-1</sup> | 8        |
| 9          | Ni/VN // Ni <sub>1-x</sub> V <sub>x</sub> O <sub>2</sub> | 2 M KOH                               | 65.7 F g <sup>-1</sup> | our work |

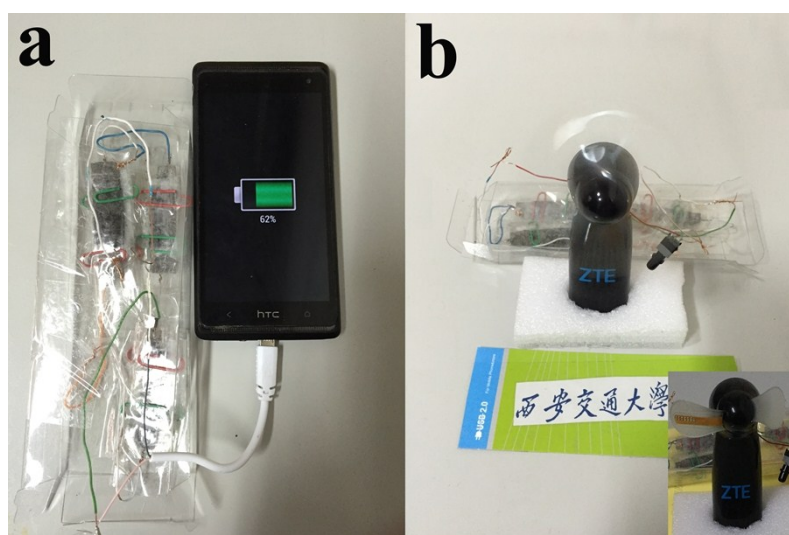

Fig.S8 (a) Photograph showing a mobile phone charged by three ASCs in series. (b) Picture showing that three prepared device can drive a rotating motor.

### Reference:

- [1] Luan, F.; Wang, G.; Ling, Y.; Lu, X.; Wang, H.; Tong, Y.; Liu, X. X.; Li, Y. High Energy Density Asymmetric Supercapacitors with a Nickel Oxide Nanoflake Cathode and a 3D Reduced Graphene Oxide Anode. *Nanoscale* **2013**, *5*, 7984-7990.
- [2] Yu, W.; Lin, W.; Shao, X.; Hu, Z.; Li, R.; Yuan, D. High Performance Supercapacitor Based on Ni<sub>3</sub>S<sub>2</sub>/Carbon Nanofibers and Carbon Nanofibers Electrodes Derived from Bacterial Cellulose. *J. Power Sources* **2014**, *272*, 137-143.

- [3] Yuan, C.; Zhang, L.; Hou, L.; Pang G.; Oh, W. H. One-Step Hydrothermal Fabrication of Strongly Coupled  $\text{Co}_3\text{O}_4$  Nanosheets-Reduced Graphene Oxide for Electrochemical Capacitors. *RSC Adv.* **2014**, *4*, 14408-14413.
- [4] Tang, C.; Tang, Z.; Gong, H. Hierarchically Porous Ni-Co Oxide for High Reversibility Asymmetric Full-Cell Supercapacitors. *J. Electrochem. Soc.* **2012**, *159*, A651-A656.
- [5] Lei, Z.; Zhang, J.; Zhao, X. S. Ultrathin  $\text{MnO}_2$  Nanofibers Grown on Graphitic Carbon Spheres as High-Performance Asymmetric Supercapacitor Electrodes. *J. Mater. Chem.* **2012**, *22*, 153-160.
- [6] Wang, D. W.; Li, F.; Cheng, H. M. Hierarchical Porous Nickel Oxide and Carbon as Electrode Materials for Asymmetric Supercapacitor. *J. Power Sources* **2008**, *185*, 1563-1568.
- [7] Gao, H.; Xiao, F.; Ching, C. B.; Duan, H. High-Performance Asymmetric Supercapacitor Based on Graphene Hydrogel and Nanostructured  $\text{MnO}_2$ . *ACS Appl. Mater. Interfaces* **2012**, *4*, 2801-2810.
- [8] Wang, Y. T.; Lu, A. H.; Zhang, H. L.; Li, W. C. Synthesis of Nanostructured Mesoporous Manganese Oxides with Three-Dimensional Frameworks and Their Application in Supercapacitors. *J. Phys. Chem. C* **2011**, *115*, 5413-5421.
